# Supplementary material for: Antitumor effect of the novel sphingosine kinase 2 inhibitor ABC294640 is enhanced by inhibition of autophagy and by sorafenib in human cholangiocarcinoma cells
Source: PubMed Central journal article supplement (PMC4991440; doi:10.18632/oncotarget.7914), 2016-03-04
Supplement: oncotarget-07-20080-s001.pdf [file oncotarget-07-20080-s001.pdf]

## Antitumor effect of the novel sphingosine kinase 2 inhibitor ABC294640 is enhanced by inhibition of autophagy and by sorafenib in human cholangiocarcinoma cells

### Supplementary Materials

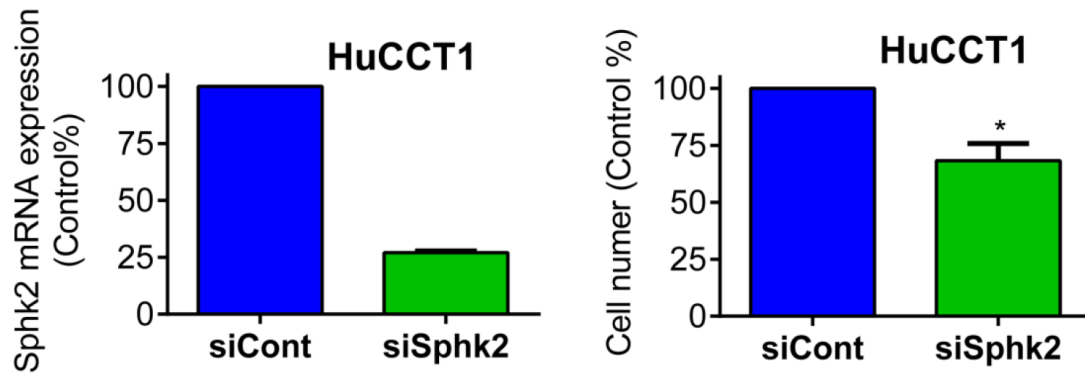

**Supplementary Figure S1: Knock down of Sphk2 using specific siRNA inhibits cell proliferation in HuCCT1 cells.** HuCCT1 cells were seeded in 6-wells and transfected with siSphk2 (50 nM) or siControl for 72 h. Then Sphk2 mRNA was determined by real-time q-PCR and cell proliferation was determined by cell number counting. Data are mean  $\pm$  SEM. \* $P < 0.05$ .
